# Supplementary material for: 3D printing lamellar Ti3C2Tx MXene/graphene hybrid aerogels for enhanced electromagnetic interference shielding performance
Source: Royal Society of Chemistry journal article supplement (doi:10.1039/d2ra02951k), 2022-01-01
Supplement: d2ra02951k1.pdf [file d2ra02951k1.pdf]

## Supplementary Information

### 3D printing lamellar $\text{Ti}_3\text{C}_2\text{T}_x$ MXene/graphene hybrid aerogels for enhanced electromagnetic interference shielding performance

Tianxiang Hua,<sup>‡<sup>ab</sup></sup> Hao Guo,<sup>‡<sup>b</sup></sup> Jing Qin,<sup>ab</sup> Qixin Wu,<sup>ab</sup> Lingying Li<sup>b</sup> and Bo Qian<sup>\*<sup>ab</sup></sup>

Author affiliations

<sup>‡</sup> These authors contributed equally to this work.

\*Corresponding authors

<sup>a</sup>School of Nano-Tech and Nano-Bionics, University of Science and Technology of China

<sup>b</sup>Suzhou Institute of Nano-Tech and Nano-Bionics, Chinese Academy of Sciences, China

### Mathematical formulation of the shield efficiency calculate :

S11 and S21 represent the reflection coefficient and transmission coefficient of the material to the electromagnetic (EM) wave, which are directly obtained by the vector network analyzer. The transmittance (T) and reflectance (R) of the samples are calculated by the following formulas<sup>1-3</sup>:

$$R = |S11|^2, \quad T = |S21|^2$$

And the absorbance coefficient (A) can be calculated from the follow relationship:

$$A = 1 - R - T \quad (1)$$

Absorption efficiency is related to the absorbed power of the incident EM wave after entering the material and the residual power of the incident EM wave after reflection.

The calculation formula is as follows:

$$A_{eff} = \frac{A}{1-R} = \frac{1-R-T}{1-R} \quad (2)$$

The total EMI SE ( $SE_T$ ) of a material consists of the contributions from reflection ( $SE_R$ ), absorption ( $SE_A$ ) and multiple reflections ( $SE_M$ ), and their relationship is that:

$$SE_T = SE_R + SE_A + SE_M \quad (3)$$

and  $SE_M$  can be ignored in case  $SE_T > 15$  dB, therefore,

$$SE_T(dB) = SE_R(dB) + SE_A(dB) \quad (4)$$

The reflection and absorption shielding effectiveness can be extracted from the following equation:

$$SE_R(dB) = -10 \log_{10}(1-R) \quad (5)$$

and

$$SE_A(dB) = -10 \log_{10}(1-A_{eff}) = -10 \log_{10} \left( 1 - \frac{1-R-T}{1-R} \right) = -10 \log_{10} \left( \frac{T}{1-R} \right) \quad (6)$$

and,  $Z_{in}$  is the absorbent input impedance, calculated with the equation:

$$Z_{in} = Z_0 \sqrt{\frac{\mu_r}{\epsilon_r}} \operatorname{thah} \left( j \frac{2\pi f d \sqrt{\mu_r \epsilon_r}}{c} \right) \quad (7)$$

where  $Z_0$  is the impedance of air,  $\mu_r$  is the relative permeability,  $\epsilon_r$  is the relative permittivity,  $j$  is the imaginary unit of complex number,  $c$  is the speed of light,  $d$  is the

thickness of the sample, and  $f$  is the microwave frequency.

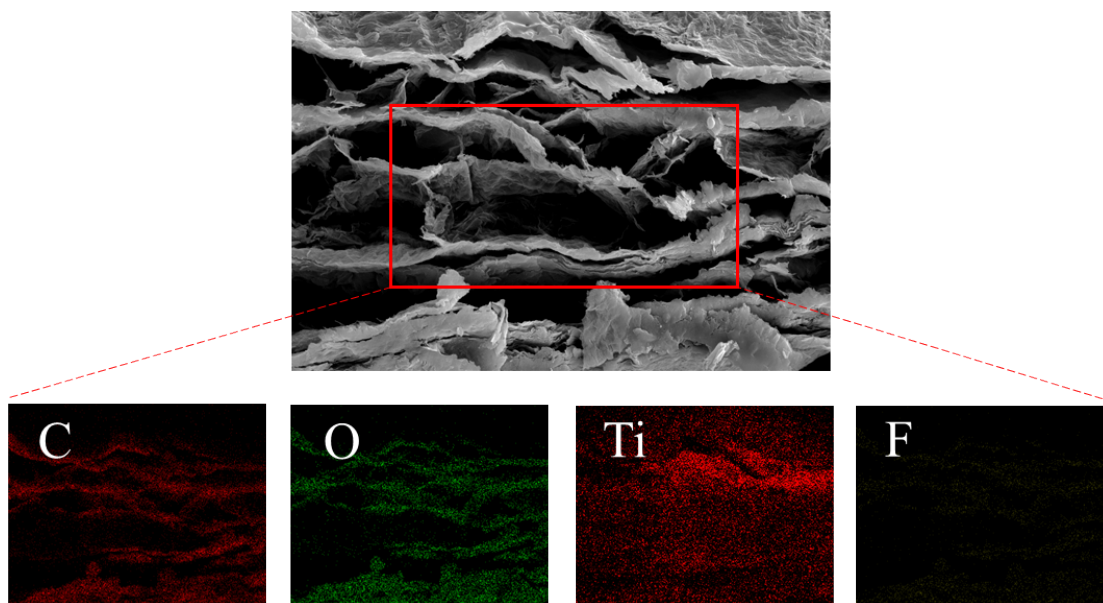

**Figure S1.** SEM image of MGA-3 and corresponding EDX elemental mappings of C, O, Ti and F in the same area, in which F is the original picture.

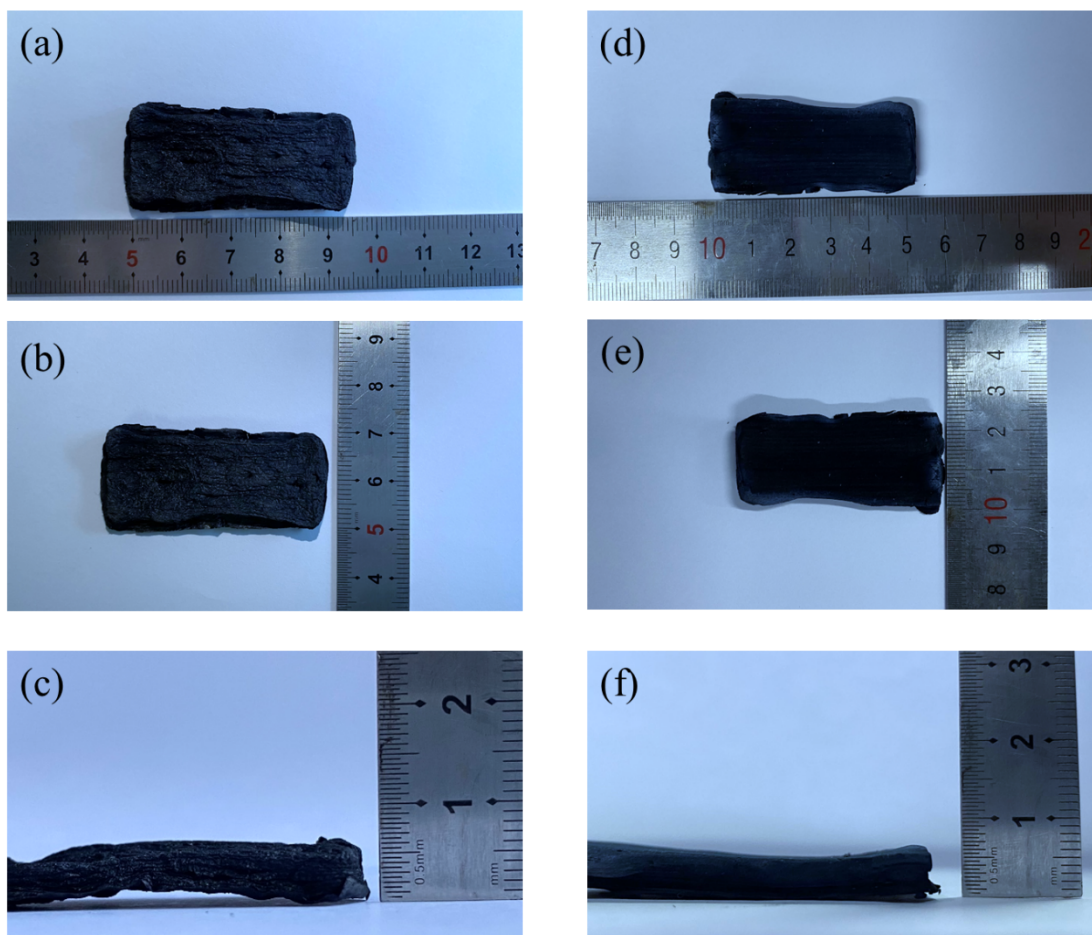

**Figure S2.** (a-c) Digital photos of MXene/rGO aerogel. (d-f) Digital photos of

MXene/GO aerogel.

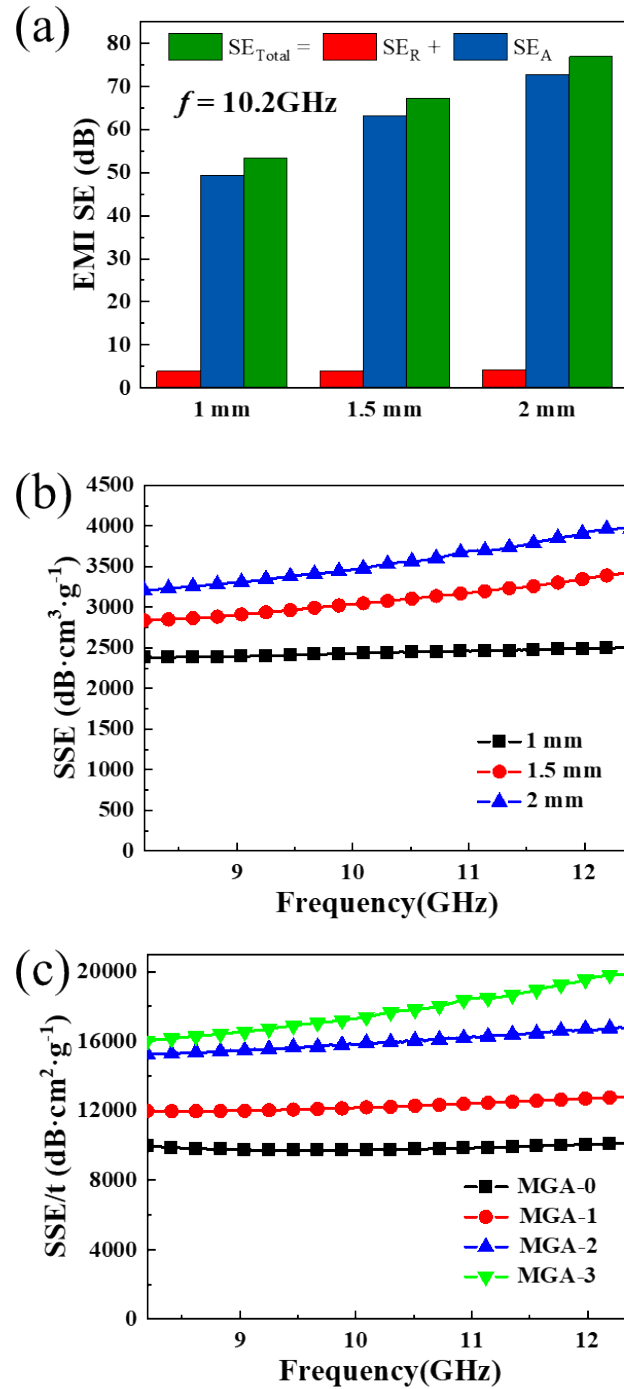

**Figure S3.** (a) Contrast of total shielding effectiveness ( $SE_{\text{Total}}$ ), absorption shielding effectiveness ( $SE_{\text{A}}$ ), and reflective shielding effectiveness ( $SE_{\text{R}}$ ) at 10.2GHz of GMA-3 with the thickness from 1 mm to 2 mm. (b) SSE of MGA-3 with the thickness from 1 mm to 2 mm. (c) SSE/t of MGA-0, MGA-1, MGA-2 and MGA-3 with the thickness of 2 mm.

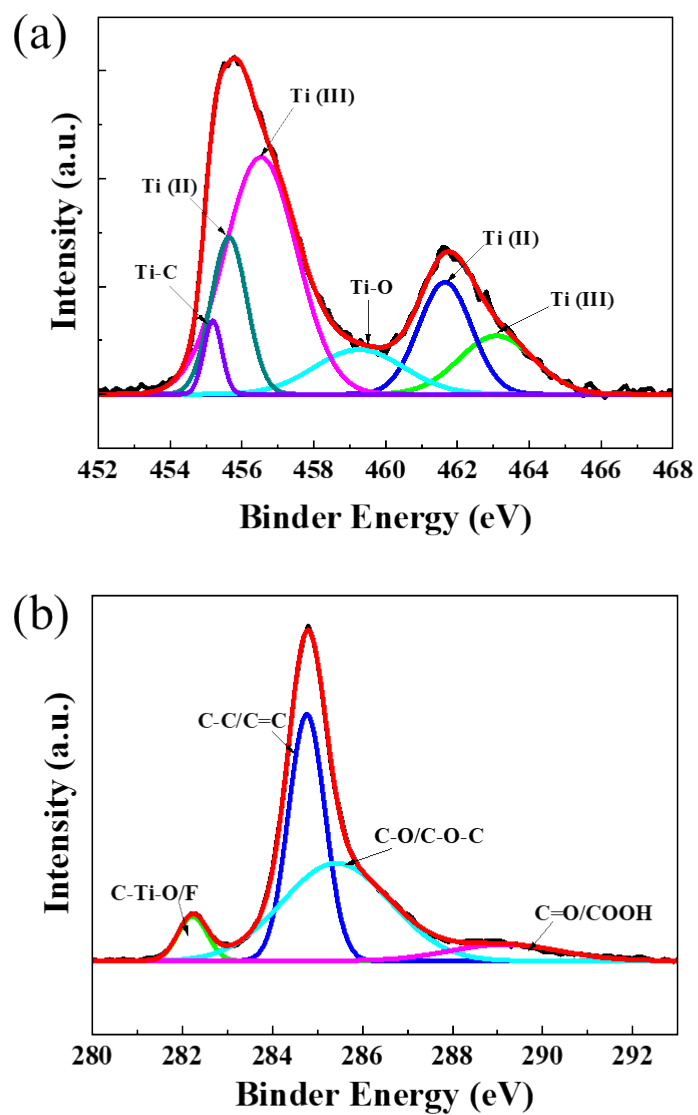

**Figure S4.** High-resolution XPS spectra of Ti 2p (a) and C 1s (b) of MXene/graphene aerogels.

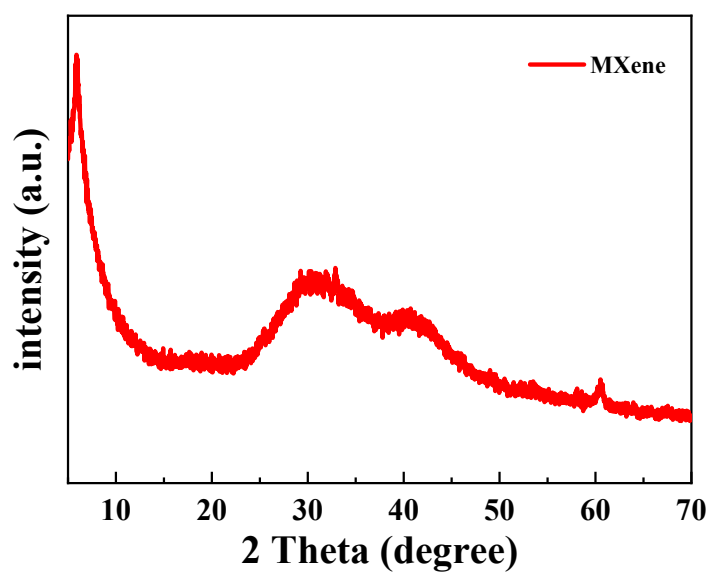

**Figure S5.** X-ray diffraction (XRD) patterns of Mxene aerogels.

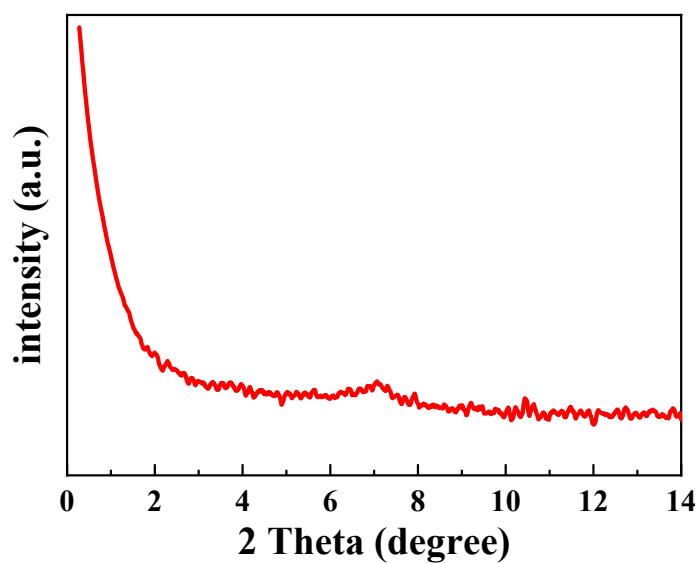

**Figure S6.** Small Angle X-ray Scattering (SAXS) patterns of Mxene/rGO aerogels.

## References

1. B. Shen, Y. Li, D. Yi, W. Zhai, X. Wei and W. Zheng, *Carbon*, 2017, **113**, 55-62.
2. S. M. Zhao, Y. H. Yan, A. L. Gao, S. Zhao, J. Cui and G. F. Zhang, *Acs Applied Materials & Interfaces*, 2018, **10**, 26723-26732.
3. J. Liu, Z. Liu, H.-B. Zhang, W. Chen, Z. Zhao, Q.-W. Wang and Z.-Z. Yu, *Advanced Electronic Materials*, 2020, **6**, 1901094.
